# Supplementary material for: Graphitic carbon nitride nanosheet supported silica nanochannel film for enhanced electrochemiluminescence sensing of 2,4,6-trichlorophenol and prochloraz
Source: Royal Society of Chemistry journal article supplement (doi:10.1039/d4ra03623a), 2024-01-01
Supplement: d4ra03623a1.pdf [file d4ra03623a1.pdf]

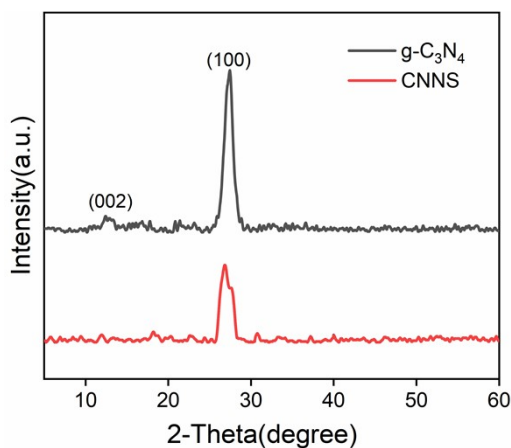

**Figure S1.** XRD patterns of g-C<sub>3</sub>N<sub>4</sub> and CNNS.

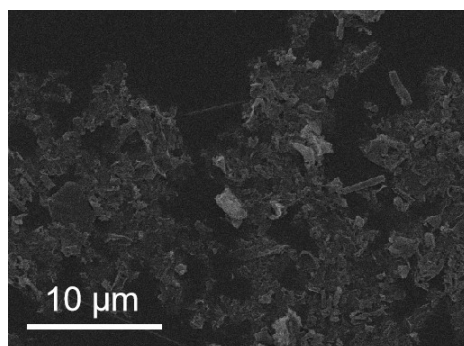

**Figure S2.** SEM images of CNNS.

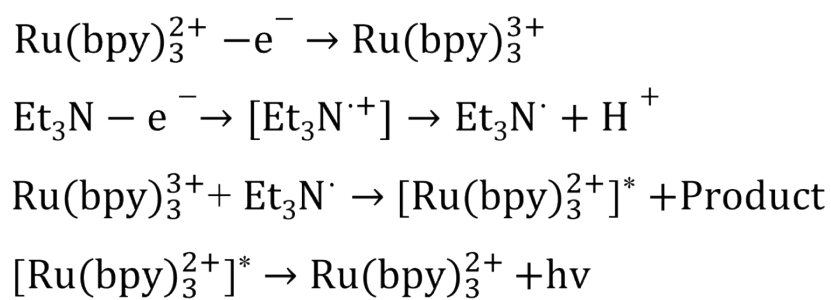

**Figure S3.** The illustration for the ECL process of Ru(bpy)<sup>3+</sup>/Et<sub>3</sub>N system.

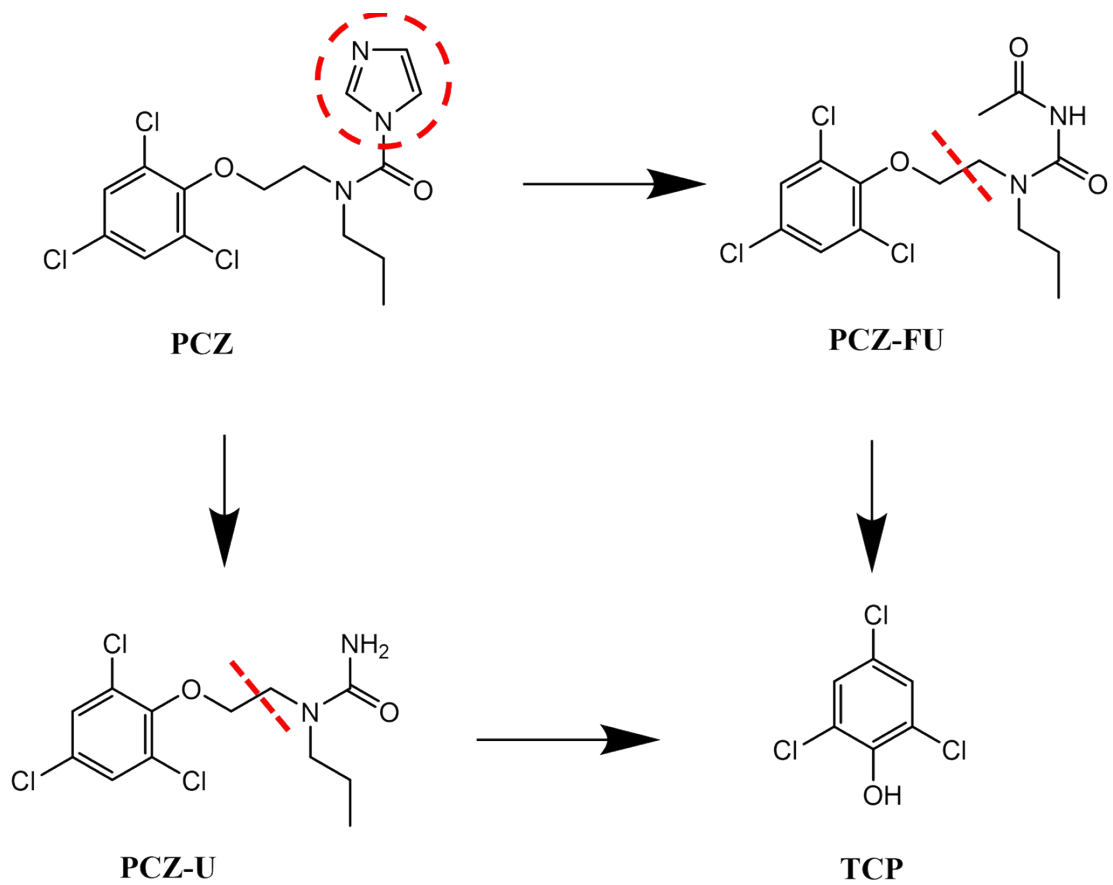

**Figure S4.** The reaction scheme about the generation of TCP from prochloraz.
